# Supplementary material
Source: publisher figshare collection journal article supplement (https://gsajournals.figshare.com/ndownloader/files/13273007)
Supplement: Supplementary file 1 [file 13273007]

## Sheet: Input List
14-3-3epsilon
14-3-3zeta		Settings
Aats-gln		1. Provide cluster identifiers in plain text, one per line
Ac78C		2. Select annotation(s)
AcCoAS		3. Select ontology: Fly (FlyBase), Full Ontology
Act42A		4. Biological process / Cellular component / Molecular function
Adgf-A		Compute p-values / Apply cutoff 0.01 / Apply Bonferroni correction
Akap200
alpha-Est10		Otherwise, used defaults
alpha-Spec
AnnIX
Arpc3B
aru
Atet
Atf3
Baldspot
bark
beta-Spec
betaTub60D
BI-1
bib
blow
BM-40-SPARC
bwa
c(3)G
CAH2
cbt
CG10062
CG10103
CG10126
CG10178
CG10249
CG10286
CG10433
CG10550
CG10559
CG10621
CG10650
CG10660
CG10824
CG11275
CG1136
CG11791
CG12012
CG12014
CG12290
CG12517
CG12581
CG12730
CG12744
CG13124
CG13321
CG13377
CG13506
CG13510
CG13516
CG13636
CG13667
CG13868
CG14227
CG14701
CG14855
CG14869
CG14879
CG15210
CG15211
CG15347
CG15629
CG1572
CG1600
CG16700
CG17224
CG17323
CG17625
CG17732
CG18067
CG18268
CG18316
CG18545
CG18547
CG18744
CG2064
Cg25C
CG2641
CG30069
CG3014
CG30154
CG30197
CG30269
CG30323
CG30345
CG3091
CG3097
CG31373
CG31436
CG31743
CG3191
CG31955
CG32091
CG32850
CG33158
CG33298
CG3348
CG3397
CG34417
CG42394
CG4250
CG42575
CG42675
CG4269
CG43078
CG43341
CG4338
CG43462
CG44250
CG44325
CG45050
CG46339
CG4797
CG4839
CG5028
CG5059
CG5255
CG5346
CG5390
CG5597
CG5618
CG5707
CG6074
CG6231
CG6340
CG6357
CG6409
CG6424
CG6426
CG6490
CG6891
CG7009
CG7059
CG7133
CG7142
CG7194
CG7497
CG7702
CG7900
CG8369
CG8547
CG8740
CG8965
CG9360
CG9372
CG9498
CG9505
CG9743
CG9894
chrb
ckn
cno
cora
CR43790
CR44953
CR6900
cry
Csk
CSN5
cv-c
cwo
Cyp12d1-d
Cyp6a13
defl
desat1
Dic1
Diedel
dm
dome
drl
Dscam
E(spl)m3-HLH
E(spl)mbeta-HLH
Ect4
edl
Egfr
elB
emp
ena
f
Fas1
Fas2
Fas3
fax
fng
Frl
Fs
fz2
GABA-B-R2
Galpha73B
Gfat1
Gli
GM10545
Gpo-1
Gr64b
GstO3
GstT4
h
His2B:CG33868
Hmgs
hoe2
Hr96
Hrb27C
Idgf3
Ilp6
Imp
ImpL2
ImpL3
Inx3
Inx7
Irc
Iris
isoQC
jim
kek1
l(1)G0232
LamC
LanB1
LanB2
Lasp
laza
LpR2
Lrch
m
MadM
Mbs
Mdr49
Men-b
MESR3
metro
MFS16
Mgat2
mid
Mmp2
modSP
mp
msn
Msp-300
mthl3
mthl4
mthl8
MtnA
MtnB
Nf-YA
NK7.1
NKAIN
Nmdmc
noc
nord
Npc2b
NT5E-2
Oatp74D
Obp46a
Obp99a
ogre
p130CAS
pain
PebIII
Pepck
PGRP-LA
PGRP-LC
Phk-3
phm
pico
Pka-C2
Pka-R2
pnt
Ppa
ppk29
Ppn
Prosap
pst
Pvr
rgn
Rho1
RpL30
RpL38
scb
sei
Sema-1b
SH3PX1
Sk1
Smox
Sobp
Socs36E
SP1173
spn-F
Spn42Dd
Src64B
Ssk
stet
Strn-Mlck
stv
sty
Sulf1
Syp
Syx4
Tep4
Thor
Tis11
TotA
TotM
trol
tsl
Tsp42Ed
Tsp42Ee
Uhg5
upd1
ush
vir-1
zip
Zw

## Sheet: Cellular Component
Organism: Fly	Annotation provider: FlyBase
GOID	Term	Corrected P-value	Uncorrected P-value	Number annotated	Annotated genes
GO:0071944	cell periphery	3.1294e-10	1.48313e-12	65	14-3-3epsilon, 14-3-3zeta, Ac78C, Akap200, alpha-Spec, AnnIX, Atet, beta-Spec, bib, CAH2, CG12517, CG13636, CG14855, CG32091, CG33298, CG42575, CG4839, CG6231, cno, cora, Csk, cv-c, dome, drl, Dscam, Egfr, emp, Fas1, Fas2, Fas3, fax, fz2, GABA-B-R2, Galpha73B, Gli, Inx3, kek1, laza, LpR2, Lrch, m, Mbs, Mdr49, Mmp2, msn, Msp-300, Oatp74D, ogre, PGRP-LA, PGRP-LC, Pka-R2, Pvr, Rho1, scb, sei, Sema-1…
GO:0005886	plasma membrane	5.80779e-09	2.75251e-11	58	14-3-3epsilon, 14-3-3zeta, Ac78C, Akap200, alpha-Spec, Atet, beta-Spec, bib, CAH2, CG13636, CG14855, CG32091, CG33298, CG42575, CG4839, CG6231, cora, Csk, cv-c, dome, drl, Dscam, Egfr, emp, Fas1, Fas2, Fas3, fax, fz2, GABA-B-R2, Galpha73B, Gli, Inx3, kek1, laza, LpR2, m, Mdr49, Mmp2, Msp-300, Oatp74D, ogre, PGRP-LA, PGRP-LC, Pka-R2, Pvr, Rho1, scb, sei, Sema-1b, SH3PX1, Sk1, Src64B, Ssk, sty, Syx…
GO:0030054	cell junction	2.50648e-08	1.18791e-10	20	bark, bib, CG10249, ckn, cno, cora, Csk, ena, Fas3, Gli, Inx3, Inx7, Lasp, Mbs, ogre, p130CAS, Rho1, scb, Ssk, zip
GO:0044459	plasma membrane part	3.81881e-07	1.80986e-09	42	alpha-Spec, Atet, beta-Spec, bib, CAH2, CG13636, CG14855, CG42575, CG6231, Csk, cv-c, dome, drl, Dscam, emp, Fas2, Fas3, fz2, GABA-B-R2, Galpha73B, Gli, Inx3, kek1, laza, m, Mdr49, Mmp2, Msp-300, Oatp74D, ogre, PGRP-LA, PGRP-LC, Rho1, scb, sei, Sema-1b, SH3PX1, Src64B, Ssk, Syx4, Tsp42Ed, Tsp42Ee
GO:0005911	cell-cell junction	5.80538e-06	2.75137e-08	14	bark, cno, cora, Csk, ena, Fas3, Gli, Inx3, Inx7, Mbs, ogre, Rho1, Ssk, zip
GO:0031224	intrinsic component of membrane	5.9722e-06	2.83043e-08	61	Atet, Baldspot, BI-1, bib, bwa, CAH2, CG12290, CG12730, CG14855, CG15211, CG1572, CG30345, CG31743, CG32091, CG33298, CG42575, CG4797, CG5059, CG6231, CG7497, desat1, Dic1, drl, Dscam, Egfr, emp, Fas2, Fas3, fng, fz2, GABA-B-R2, Gli, Gr64b, hoe2, Inx3, Inx7, Iris, kek1, laza, m, Mdr49, MFS16, Mgat2, Msp-300, mthl3, mthl4, mthl8, Oatp74D, ogre, pain, PGRP-LA, PGRP-LC, ppk29, scb, sei, Sema-1b, Ssk…
GO:0016021	integral component of membrane	8.87301e-06	4.20522e-08	60	Atet, Baldspot, BI-1, bib, bwa, CG12290, CG12730, CG14855, CG15211, CG1572, CG30345, CG31743, CG32091, CG33298, CG42575, CG4797, CG5059, CG6231, CG7497, desat1, Dic1, drl, Dscam, Egfr, emp, Fas2, Fas3, fng, fz2, GABA-B-R2, Gli, Gr64b, hoe2, Inx3, Inx7, Iris, kek1, laza, m, Mdr49, MFS16, Mgat2, Msp-300, mthl3, mthl4, mthl8, Oatp74D, ogre, pain, PGRP-LA, PGRP-LC, ppk29, scb, sei, Sema-1b, Ssk, stet…
GO:0016020	membrane	3.4111e-05	1.61663e-07	88	14-3-3epsilon, 14-3-3zeta, Ac78C, Akap200, alpha-Spec, Atet, Baldspot, bark, beta-Spec, BI-1, bib, bwa, CAH2, CG12290, CG12730, CG13636, CG14855, CG15211, CG1572, CG16700, CG30345, CG31743, CG32091, CG33298, CG42575, CG4797, CG4839, CG5059, CG6231, CG7497, cora, Csk, cv-c, desat1, Dic1, dome, drl, Dscam, Egfr, emp, Fas1, Fas2, Fas3, fax, fng, fz2, GABA-B-R2, Galpha73B, Gli, Gpo-1, Gr64b, hoe2, In…
GO:0044425	membrane part	5.15359e-05	2.44246e-07	72	alpha-Spec, Atet, Baldspot, beta-Spec, BI-1, bib, bwa, CAH2, CG12290, CG12730, CG13636, CG14855, CG15211, CG1572, CG30345, CG31743, CG32091, CG33298, CG42575, CG4797, CG5059, CG6231, CG7497, Csk, cv-c, desat1, Dic1, dome, drl, Dscam, Egfr, emp, Fas2, Fas3, fng, fz2, GABA-B-R2, Galpha73B, Gli, Gr64b, hoe2, Inx3, Inx7, Iris, kek1, laza, m, Mdr49, MFS16, Mgat2, Mmp2, Msp-300, mthl3, mthl4, mthl8, Oa…
GO:0005604	basement membrane	0.000697757	3.30691e-06	5	Cg25C, LanB1, LanB2, Ppn, trol
GO:0044420	extracellular matrix component	0.000697757	3.30691e-06	5	Cg25C, LanB1, LanB2, Ppn, trol
GO:0031226	intrinsic component of plasma membrane	0.00108462	5.14037e-06	26	Atet, bib, CAH2, CG14855, CG42575, CG6231, drl, Dscam, emp, Fas3, fz2, GABA-B-R2, Gli, kek1, laza, Mdr49, Msp-300, Oatp74D, PGRP-LA, PGRP-LC, scb, sei, Sema-1b, Ssk, Tsp42Ed, Tsp42Ee
GO:0005887	integral component of plasma membrane	0.00204668	9.69989e-06	25	Atet, bib, CG14855, CG42575, CG6231, drl, Dscam, emp, Fas3, fz2, GABA-B-R2, Gli, kek1, laza, Mdr49, Msp-300, Oatp74D, PGRP-LA, PGRP-LC, scb, sei, Sema-1b, Ssk, Tsp42Ed, Tsp42Ee
GO:0070161	anchoring junction	0.00235992	1.11844e-05	10	bark, bib, CG10249, ckn, cno, ena, Fas3, Lasp, p130CAS, scb
GO:0005912	adherens junction	0.00235992	1.11844e-05	10	bark, bib, CG10249, ckn, cno, ena, Fas3, Lasp, p130CAS, scb
	P-value cutoff	0.01
	Regulation links followed	Yes
	Bonferroni correction	211
	Annotated identifiers	238
	Unknown identifiers	37
	Unannotated identifiers	80
	Background size	16085
	Min p-value	1.48313e-12
	List size	318

## Sheet: Molecular Function
Organism: Fly	Annotation provider: FlyBase
GOID	Term	Corrected P-value	Uncorrected P-value	Number annotated	Annotated genes
GO:0003779	actin binding	6.63551e-06	2.82362e-08	15	alpha-Spec, AnnIX, Arpc3B, beta-Spec, CG34417, CG6891, cora, dome, ena, f, Frl, Lasp, Msp-300, Strn-Mlck, zip
GO:0005515	protein binding	4.14276e-05	1.76288e-07	80	14-3-3epsilon, 14-3-3zeta, Akap200, alpha-Spec, AnnIX, Arpc3B, Atf3, beta-Spec, blow, BM-40-SPARC, CG10249, CG10286, CG11275, CG12517, CG34417, CG6891, CG8965, ckn, cno, cora, cry, Csk, CSN5, cwo, Diedel, dm, dome, drl, Dscam, E(spl)m3-HLH, E(spl)mbeta-HLH, edl, Egfr, elB, ena, f, Fas1, Fas2, Fas3, Frl, fz2, GABA-B-R2, Galpha73B, Gli, h, His2B:CG33868, Hrb27C, Idgf3, Ilp6, ImpL2, kek1, Lasp, MadM…
	P-value cutoff	0.01
	Regulation links followed	Yes
	Bonferroni correction	235
	Annotated identifiers	243
	Unknown identifiers	37
	Unannotated identifiers	75
	Background size	16085
	Min p-value	2.82362e-08
	List size	318

## Sheet: Biological Process
Organism: Fly	Annotation provider: FlyBase
GOID	Term	Corrected P-value	Uncorrected P-value	Number annotated	Annotated genes
GO:0050896	response to stimulus	8.63865e-11	5.90475e-14	123	14-3-3epsilon, 14-3-3zeta, Ac78C, AcCoAS, Adgf-A, Akap200, alpha-Spec, aru, Atf3, bark, beta-Spec, betaTub60D, BI-1, bib, BM-40-SPARC, cbt, CG10433, CG12290, CG12517, CG12744, CG13377, CG13510, CG13516, CG1600, CG33298, CG5059, CG6426, CG7497, CG8965, CG9372, CG9894, chrb, ckn, cno, cry, Csk, CSN5, cv-c, Cyp12d1-d, Cyp6a13, desat1, Dic1, Diedel, dm, dome, drl, Dscam, Ect4, edl, Egfr, elB, ena, Fa…
GO:0009605	response to external stimulus	8.92899e-11	6.1032e-14	60	14-3-3epsilon, Adgf-A, alpha-Spec, beta-Spec, betaTub60D, BI-1, CG12744, CG6426, CG9372, ckn, cry, Cyp6a13, desat1, Diedel, dm, dome, drl, Dscam, ena, Fas1, Fas2, Fas3, fz2, GABA-B-R2, Hr96, Hrb27C, Imp, LanB1, laza, mid, Mmp2, modSP, mp, msn, mthl3, mthl4, mthl8, ogre, pain, PebIII, PGRP-LA, PGRP-LC, Phk-3, Pka-R2, Pvr, Rho1, scb, Smox, Spn42Dd, Src64B, Sulf1, Tep4, Thor, TotA, TotM, trol, upd1,…
GO:0007399	nervous system development	1.26217e-10	8.6273e-14	68	14-3-3epsilon, Aats-gln, alpha-Spec, Atf3, beta-Spec, betaTub60D, bib, bwa, CG10249, CG13377, CG6490, CG8965, CG9372, ckn, cno, cora, CSN5, cv-c, cwo, dm, drl, Dscam, E(spl)m3-HLH, E(spl)mbeta-HLH, edl, Egfr, elB, ena, f, Fas1, Fas2, Fas3, fax, Frl, fz2, Gli, h, Hrb27C, Imp, jim, LpR2, Mbs, metro, mid, Mmp2, mp, msn, Nf-YA, noc, p130CAS, Pka-R2, pnt, Prosap, Pvr, Rho1, RpL30, scb, Smox, Socs36E, …
GO:0030182	neuron differentiation	1.61796e-10	1.10592e-13	55	14-3-3epsilon, Aats-gln, alpha-Spec, beta-Spec, betaTub60D, CG10249, CG6490, CG8965, CG9372, ckn, cora, CSN5, cv-c, cwo, drl, Dscam, edl, Egfr, elB, ena, f, Fas1, Fas2, Fas3, fax, Frl, fz2, Gli, h, Hrb27C, Imp, jim, LpR2, Mbs, metro, mid, Mmp2, mp, msn, Nf-YA, noc, p130CAS, Pka-R2, pnt, Rho1, scb, Smox, Socs36E, spn-F, Src64B, sty, Sulf1, trol, upd1, zip
GO:0048699	generation of neurons	1.81654e-10	1.24166e-13	58	14-3-3epsilon, Aats-gln, alpha-Spec, beta-Spec, betaTub60D, CG10249, CG6490, CG8965, CG9372, ckn, cora, CSN5, cv-c, cwo, dm, drl, Dscam, E(spl)m3-HLH, E(spl)mbeta-HLH, edl, Egfr, elB, ena, f, Fas1, Fas2, Fas3, fax, Frl, fz2, Gli, h, Hrb27C, Imp, jim, LpR2, Mbs, metro, mid, Mmp2, mp, msn, Nf-YA, noc, p130CAS, Pka-R2, pnt, Rho1, scb, Smox, Socs36E, spn-F, Src64B, sty, Sulf1, trol, upd1, zip
GO:0022008	neurogenesis	2.98275e-10	2.03879e-13	59	14-3-3epsilon, Aats-gln, alpha-Spec, beta-Spec, betaTub60D, CG10249, CG6490, CG8965, CG9372, ckn, cno, cora, CSN5, cv-c, cwo, dm, drl, Dscam, E(spl)m3-HLH, E(spl)mbeta-HLH, edl, Egfr, elB, ena, f, Fas1, Fas2, Fas3, fax, Frl, fz2, Gli, h, Hrb27C, Imp, jim, LpR2, Mbs, metro, mid, Mmp2, mp, msn, Nf-YA, noc, p130CAS, Pka-R2, pnt, Rho1, scb, Smox, Socs36E, spn-F, Src64B, sty, Sulf1, trol, upd1, zip
GO:0040011	locomotion	4.42131e-09	3.02209e-12	46	14-3-3epsilon, alpha-Spec, beta-Spec, betaTub60D, CG13636, CG14869, ckn, cry, Csk, CSN5, cv-c, dome, drl, Dscam, Egfr, ena, Fas1, Fas2, Fas3, fz2, Gli, Hrb27C, l(1)G0232, LanB1, laza, Mdr49, mid, Mmp2, mp, msn, Msp-300, pain, phm, Pka-R2, pnt, Pvr, Rho1, scb, Smox, Socs36E, Src64B, Strn-Mlck, Sulf1, trol, upd1, zip
GO:0048731	system development	6.9135e-09	4.72557e-12	92	14-3-3epsilon, Aats-gln, Adgf-A, Akap200, alpha-Spec, AnnIX, Atf3, bark, beta-Spec, betaTub60D, BI-1, bib, BM-40-SPARC, bwa, cbt, CG10249, CG13377, CG14869, Cg25C, CG30069, CG6490, CG8369, CG8965, CG9372, ckn, cno, cora, CSN5, cv-c, cwo, desat1, dm, dome, drl, Dscam, E(spl)m3-HLH, E(spl)mbeta-HLH, edl, Egfr, elB, ena, f, Fas1, Fas2, Fas3, fax, fng, Frl, fz2, Gli, h, Hrb27C, Idgf3, Imp, jim, LamC,…
GO:0009888	tissue development	7.01318e-09	4.7937e-12	63	14-3-3epsilon, Akap200, alpha-Spec, AnnIX, bark, bib, blow, BM-40-SPARC, cbt, CG12517, CG13636, Cg25C, CG30069, CG34417, CG8369, cno, cora, CSN5, cv-c, desat1, dm, dome, drl, Egfr, elB, ena, f, Fas2, Fas3, fng, Frl, fz2, Galpha73B, Gli, Hrb27C, Idgf3, Inx3, l(1)G0232, LamC, LanB1, m, Mbs, mid, Mmp2, msn, Msp-300, noc, phm, pico, pnt, Pvr, rgn, Rho1, scb, Smox, Socs36E, Src64B, Ssk, sty, Syp, upd1…
GO:0030154	cell differentiation	2.34436e-08	1.60243e-11	88	14-3-3epsilon, 14-3-3zeta, Aats-gln, Adgf-A, alpha-Spec, bark, beta-Spec, betaTub60D, BI-1, bib, blow, CG10249, CG12517, CG13636, Cg25C, CG6490, CG8965, CG9372, ckn, cno, cora, Csk, CSN5, cv-c, cwo, dm, dome, drl, Dscam, E(spl)m3-HLH, E(spl)mbeta-HLH, edl, Egfr, elB, ena, f, Fas1, Fas2, Fas3, fax, fng, Frl, fz2, Gli, h, Hmgs, Hrb27C, Imp, ImpL3, jim, kek1, l(1)G0232, LanB1, LanB2, Lasp, LpR2, m, …
GO:0061564	axon development	2.8913e-08	1.97628e-11	30	14-3-3epsilon, alpha-Spec, beta-Spec, betaTub60D, ckn, CSN5, drl, Dscam, ena, Fas1, Fas2, Fas3, fax, Frl, fz2, Hrb27C, Imp, Mbs, mid, Mmp2, mp, msn, p130CAS, Pka-R2, Rho1, scb, Smox, Src64B, Sulf1, trol
GO:0048869	cellular developmental process	3.03604e-08	2.07521e-11	89	14-3-3epsilon, 14-3-3zeta, Aats-gln, Adgf-A, alpha-Spec, bark, beta-Spec, betaTub60D, BI-1, bib, blow, CG10249, CG12517, CG13636, Cg25C, CG46339, CG6490, CG8965, CG9372, ckn, cno, cora, Csk, CSN5, cv-c, cwo, dm, dome, drl, Dscam, E(spl)m3-HLH, E(spl)mbeta-HLH, edl, Egfr, elB, ena, f, Fas1, Fas2, Fas3, fax, fng, Frl, fz2, Gli, h, Hmgs, Hrb27C, Imp, ImpL3, jim, kek1, l(1)G0232, LanB1, LanB2, Lasp, …
GO:0048666	neuron development	8.77751e-08	5.99967e-11	46	14-3-3epsilon, Aats-gln, alpha-Spec, beta-Spec, betaTub60D, CG10249, CG6490, CG8965, CG9372, ckn, CSN5, cv-c, cwo, drl, Dscam, edl, ena, Fas1, Fas2, Fas3, fax, Frl, fz2, Gli, Hrb27C, Imp, jim, LpR2, Mbs, metro, mid, Mmp2, mp, msn, p130CAS, Pka-R2, pnt, Rho1, scb, Smox, spn-F, Src64B, sty, Sulf1, trol, upd1
GO:0007409	axonogenesis	2.3779e-07	1.62536e-10	28	14-3-3epsilon, alpha-Spec, beta-Spec, betaTub60D, ckn, CSN5, drl, Dscam, ena, Fas1, Fas2, Fas3, fax, Frl, fz2, Hrb27C, Mbs, mid, Mmp2, mp, msn, Pka-R2, Rho1, scb, Smox, Src64B, Sulf1, trol
GO:0060429	epithelium development	2.52333e-07	1.72477e-10	57	14-3-3epsilon, Akap200, alpha-Spec, AnnIX, bark, bib, BM-40-SPARC, cbt, CG12517, CG13636, Cg25C, CG30069, CG8369, cno, cora, CSN5, cv-c, desat1, dm, dome, drl, Egfr, elB, ena, f, Fas2, Fas3, fng, Frl, fz2, Gli, Hrb27C, Idgf3, Inx3, l(1)G0232, LanB1, m, Mbs, mid, Mmp2, msn, noc, phm, pico, pnt, Pvr, Rho1, scb, Smox, Socs36E, Src64B, Ssk, sty, Syp, upd1, ush, zip
GO:0006928	movement of cell or subcellular component	2.93913e-07	2.00898e-10	44	14-3-3epsilon, alpha-Spec, beta-Spec, betaTub60D, CG13636, CG14869, ckn, Csk, CSN5, cv-c, dome, drl, Dscam, Egfr, ena, Fas1, Fas2, Fas3, fz2, Gli, Hrb27C, l(1)G0232, LanB1, m, Mdr49, mid, Mmp2, mp, msn, Msp-300, phm, Pka-R2, pnt, Pvr, Rho1, scb, Smox, Socs36E, Src64B, Strn-Mlck, Sulf1, trol, upd1, zip
GO:0007275	multicellular organism development	3.62558e-07	2.47818e-10	108	14-3-3epsilon, 14-3-3zeta, Aats-gln, Adgf-A, Akap200, alpha-Spec, AnnIX, Atf3, bark, beta-Spec, betaTub60D, BI-1, bib, BM-40-SPARC, bwa, cbt, CG10249, CG13377, CG14869, Cg25C, CG30069, CG6490, CG8369, CG8965, CG9372, chrb, ckn, cno, cora, CSN5, cv-c, cwo, desat1, dm, dome, drl, Dscam, E(spl)m3-HLH, E(spl)mbeta-HLH, edl, Egfr, elB, ena, f, Fas1, Fas2, Fas3, fax, fng, Frl, fz2, Gli, h, Hmgs, Hrb27C…
GO:0030030	cell projection organization	3.92414e-07	2.68225e-10	46	14-3-3epsilon, Aats-gln, alpha-Spec, beta-Spec, betaTub60D, CG10249, CG9372, ckn, cora, CSN5, cv-c, cwo, drl, Dscam, Egfr, ena, f, Fas1, Fas2, Fas3, fax, Frl, fz2, Galpha73B, Gli, Hrb27C, Imp, jim, LpR2, Mbs, metro, mid, Mmp2, mp, msn, p130CAS, Pka-R2, Pvr, Rho1, scb, SH3PX1, Smox, Src64B, Sulf1, trol, zip
GO:0007411	axon guidance	5.29598e-07	3.61995e-10	24	14-3-3epsilon, alpha-Spec, beta-Spec, betaTub60D, ckn, drl, Dscam, ena, Fas1, Fas2, Fas3, fz2, Hrb27C, mid, Mmp2, mp, msn, Pka-R2, Rho1, scb, Smox, Src64B, Sulf1, trol
GO:0008038	neuron recognition	6.20968e-07	4.24449e-10	16	alpha-Spec, beta-Spec, drl, Dscam, Fas1, Fas2, Fas3, fz2, Gli, mid, Mmp2, p130CAS, Rho1, Sulf1, trol, upd1
GO:0048468	cell development	7.87416e-07	5.3822e-10	74	14-3-3epsilon, 14-3-3zeta, Aats-gln, alpha-Spec, bark, beta-Spec, betaTub60D, BI-1, bib, CG10249, CG12517, CG13636, Cg25C, CG6490, CG8965, CG9372, ckn, cora, Csk, CSN5, cv-c, cwo, dm, dome, drl, Dscam, E(spl)m3-HLH, E(spl)mbeta-HLH, edl, Egfr, ena, Fas1, Fas2, Fas3, fax, fng, Frl, fz2, Gli, Hrb27C, Imp, jim, kek1, l(1)G0232, LanB1, LanB2, Lasp, LpR2, m, Mbs, metro, mid, Mmp2, mp, msn, Msp-300, p1…
GO:0065007	biological regulation	1.05817e-06	7.23285e-10	135	14-3-3epsilon, 14-3-3zeta, Ac78C, Adgf-A, Akap200, alpha-Spec, AnnIX, Arpc3B, aru, Atf3, bark, beta-Spec, BI-1, bib, BM-40-SPARC, bwa, cbt, CG10433, CG11275, CG12290, CG12517, CG13516, CG14701, CG1572, CG18316, Cg25C, CG33298, CG46339, CG5059, CG6340, CG6490, CG7059, CG7194, CG7497, CG8965, chrb, ckn, cno, cora, cry, Csk, CSN5, cv-c, cwo, desat1, Diedel, dm, dome, drl, Dscam, E(spl)m3-HLH, E(spl)…
GO:0050793	regulation of developmental process	1.05877e-06	7.237e-10	42	Akap200, alpha-Spec, beta-Spec, CG1572, CG6490, cno, CSN5, cv-c, desat1, dm, Dscam, E(spl)m3-HLH, E(spl)mbeta-HLH, Egfr, ena, Fas2, fz2, Galpha73B, Ilp6, Imp, Lasp, m, Mbs, metro, mid, msn, pico, pnt, Pvr, Rho1, scb, Smox, Socs36E, spn-F, Src64B, sty, Syp, Syx4, tsl, upd1, ush, zip
GO:0097485	neuron projection guidance	1.06364e-06	7.27029e-10	24	14-3-3epsilon, alpha-Spec, beta-Spec, betaTub60D, ckn, drl, Dscam, ena, Fas1, Fas2, Fas3, fz2, Hrb27C, mid, Mmp2, mp, msn, Pka-R2, Rho1, scb, Smox, Src64B, Sulf1, trol
GO:0042221	response to chemical	1.09812e-06	7.50594e-10	58	14-3-3epsilon, 14-3-3zeta, Ac78C, AcCoAS, Akap200, alpha-Spec, aru, beta-Spec, betaTub60D, BI-1, CG13377, CG1600, CG8965, CG9894, ckn, Cyp12d1-d, desat1, Dic1, dome, drl, Dscam, Egfr, ena, Fas1, Fas2, Fas3, fz2, GABA-B-R2, Gr64b, GstO3, Hr96, Hrb27C, Ilp6, ImpL2, Irc, Mdr49, mid, Mmp2, mp, msn, MtnA, MtnB, nord, Obp99a, pain, Pka-R2, pst, Pvr, Rho1, scb, SH3PX1, Smox, Socs36E, Src64B, sty, Sulf1,…
GO:0008037	cell recognition	1.22786e-06	8.39278e-10	16	alpha-Spec, beta-Spec, drl, Dscam, Fas1, Fas2, Fas3, fz2, Gli, mid, Mmp2, p130CAS, Rho1, Sulf1, trol, upd1
GO:0000902	cell morphogenesis	1.35025e-06	9.22934e-10	42	14-3-3epsilon, Aats-gln, alpha-Spec, beta-Spec, betaTub60D, CG10249, CG9372, ckn, cno, CSN5, cv-c, cwo, drl, Dscam, ena, Fas1, Fas2, Fas3, fax, Frl, fz2, h, Hrb27C, jim, LanB1, LanB2, LpR2, m, Mbs, metro, mid, Mmp2, mp, msn, Pka-R2, Rho1, scb, Smox, Src64B, Sulf1, trol, upd1
GO:0007165	signal transduction	1.40987e-06	9.63687e-10	67	14-3-3epsilon, 14-3-3zeta, Ac78C, Akap200, BI-1, bib, BM-40-SPARC, cbt, CG12290, CG12517, CG13516, CG5059, CG7497, CG8965, chrb, ckn, cno, cry, Csk, cv-c, Diedel, dm, dome, drl, Ect4, edl, Egfr, elB, Fas2, fng, Fs, fz2, GABA-B-R2, Galpha73B, Hr96, Ilp6, ImpL2, kek1, laza, Lrch, MadM, MESR3, Mmp2, modSP, mp, msn, mthl3, mthl4, mthl8, ogre, PGRP-LC, pico, pnt, Prosap, Pvr, Rho1, Smox, Socs36E, Src6…
GO:0051239	regulation of multicellular organismal process	1.58534e-06	1.08363e-09	42	Akap200, alpha-Spec, beta-Spec, CG1572, CG6490, cno, cry, CSN5, cv-c, desat1, dm, Dscam, E(spl)m3-HLH, E(spl)mbeta-HLH, Egfr, ena, Fas2, fz2, Galpha73B, Ilp6, Imp, Lasp, m, Mbs, metro, mid, msn, pain, pnt, Pvr, Rho1, scb, Smox, Socs36E, spn-F, Src64B, sty, Syp, Syx4, tsl, upd1, ush
GO:0000904	cell morphogenesis involved in differentiation	1.6986e-06	1.16104e-09	36	14-3-3epsilon, Aats-gln, alpha-Spec, beta-Spec, betaTub60D, ckn, CSN5, cv-c, cwo, drl, Dscam, ena, Fas1, Fas2, Fas3, fax, Frl, fz2, Hrb27C, jim, LanB1, LanB2, m, Mbs, mid, Mmp2, mp, msn, Pka-R2, Rho1, scb, Smox, Src64B, Sulf1, trol, upd1
GO:0032989	cellular component morphogenesis	1.98243e-06	1.35504e-09	46	14-3-3epsilon, Aats-gln, alpha-Spec, beta-Spec, betaTub60D, CG10249, CG9372, ckn, cno, CSN5, cv-c, cwo, drl, Dscam, Egfr, ena, Fas1, Fas2, Fas3, fax, Frl, fz2, h, Hrb27C, jim, LanB1, LanB2, Lasp, LpR2, m, Mbs, metro, mid, Mmp2, mp, msn, Pka-R2, Rho1, scb, Smox, Src64B, Sulf1, Syp, trol, upd1, zip
GO:0009653	anatomical structure morphogenesis	2.02069e-06	1.3812e-09	79	14-3-3epsilon, 14-3-3zeta, Aats-gln, Akap200, alpha-Spec, beta-Spec, betaTub60D, BI-1, bib, blow, BM-40-SPARC, cbt, CG10249, CG12517, CG13636, CG14869, Cg25C, CG8965, CG9372, chrb, ckn, cno, cora, Csk, CSN5, cv-c, cwo, dm, dome, drl, Dscam, Egfr, elB, ena, f, Fas1, Fas2, Fas3, fax, fng, Frl, fz2, Gli, h, Hrb27C, ImpL3, Inx3, jim, LamC, LanB1, LanB2, Lasp, LpR2, m, Mbs, metro, mid, Mmp2, mp, msn, …
GO:0065008	regulation of biological quality	2.11682e-06	1.44691e-09	58	14-3-3zeta, alpha-Spec, AnnIX, Arpc3B, aru, Atf3, bark, beta-Spec, bib, CG10433, Cg25C, CG33298, CG46339, CG5059, CG6490, CG7194, cno, cora, Csk, CSN5, cv-c, desat1, dm, Egfr, ena, Fas2, GABA-B-R2, Gli, Hr96, ImpL2, LamC, Lasp, m, MadM, metro, msn, Msp-300, MtnA, MtnB, Npc2b, p130CAS, pain, PGRP-LC, phm, pico, Pvr, Rho1, scb, sei, SH3PX1, Src64B, Syp, Syx4, Thor, Tis11, upd1, ush, zip
GO:0023052	signaling	2.17648e-06	1.48769e-09	77	14-3-3epsilon, 14-3-3zeta, Ac78C, Akap200, alpha-Spec, beta-Spec, BI-1, bib, BM-40-SPARC, cbt, CG12290, CG12517, CG13516, CG5059, CG7497, CG8965, chrb, ckn, cno, cry, Csk, cv-c, Diedel, dm, dome, drl, Ect4, edl, Egfr, elB, Fas2, fng, Fs, fz2, GABA-B-R2, Galpha73B, Gli, Hmgs, Hr96, Hrb27C, Ilp6, ImpL2, kek1, laza, Lrch, MadM, MESR3, Mmp2, modSP, mp, msn, mthl3, mthl4, mthl8, Nf-YA, ogre, PGRP-LC, …
GO:0006935	chemotaxis	2.76526e-06	1.89013e-09	24	14-3-3epsilon, alpha-Spec, beta-Spec, betaTub60D, ckn, drl, Dscam, ena, Fas1, Fas2, Fas3, fz2, Hrb27C, mid, Mmp2, mp, msn, Pka-R2, Rho1, scb, Smox, Src64B, Sulf1, trol
GO:0120036	plasma membrane bounded cell projection organization	2.96565e-06	2.0271e-09	44	14-3-3epsilon, Aats-gln, alpha-Spec, beta-Spec, betaTub60D, CG10249, CG9372, ckn, cora, CSN5, cv-c, cwo, drl, Dscam, ena, f, Fas1, Fas2, Fas3, fax, Frl, fz2, Galpha73B, Gli, Hrb27C, Imp, jim, LpR2, Mbs, metro, mid, Mmp2, mp, msn, p130CAS, Pka-R2, Rho1, scb, SH3PX1, Smox, Src64B, Sulf1, trol, zip
GO:0048856	anatomical structure development	2.99001e-06	2.04375e-09	118	14-3-3epsilon, 14-3-3zeta, Aats-gln, Adgf-A, Akap200, alpha-Spec, AnnIX, Atf3, bark, beta-Spec, betaTub60D, BI-1, bib, blow, BM-40-SPARC, bwa, cbt, CG10249, CG12517, CG13377, CG13636, CG14869, Cg25C, CG30069, CG34417, CG6490, CG8369, CG8965, CG9372, chrb, ckn, cno, cora, Csk, CSN5, cv-c, cwo, desat1, dm, dome, drl, Dscam, E(spl)m3-HLH, E(spl)mbeta-HLH, edl, Egfr, elB, ena, f, Fas1, Fas2, Fas3, fa…
GO:0031175	neuron projection development	3.17102e-06	2.16748e-09	38	14-3-3epsilon, Aats-gln, alpha-Spec, beta-Spec, betaTub60D, CG10249, CG9372, ckn, CSN5, cv-c, cwo, drl, Dscam, ena, Fas1, Fas2, Fas3, fax, Frl, fz2, Hrb27C, Imp, jim, LpR2, Mbs, metro, mid, Mmp2, mp, msn, p130CAS, Pka-R2, Rho1, scb, Smox, Src64B, Sulf1, trol
GO:0032502	developmental process	3.63514e-06	2.48472e-09	123	14-3-3epsilon, 14-3-3zeta, Aats-gln, Adgf-A, Akap200, alpha-Spec, AnnIX, Atf3, bark, beta-Spec, betaTub60D, BI-1, bib, blow, BM-40-SPARC, bwa, cbt, CG10249, CG12517, CG13377, CG13636, CG14869, CG1572, Cg25C, CG30069, CG34417, CG46339, CG6490, CG8369, CG8965, CG9372, chrb, ckn, cno, cora, Csk, CSN5, cv-c, cwo, desat1, dm, dome, drl, Dscam, E(spl)m3-HLH, E(spl)mbeta-HLH, edl, Egfr, elB, ena, f, Fas…
GO:0042330	taxis	4.55658e-06	3.11455e-09	27	14-3-3epsilon, alpha-Spec, beta-Spec, betaTub60D, ckn, cry, drl, Dscam, ena, Fas1, Fas2, Fas3, fz2, Hrb27C, laza, mid, Mmp2, mp, msn, pain, Pka-R2, Rho1, scb, Smox, Src64B, Sulf1, trol
GO:0007154	cell communication	4.77411e-06	3.26323e-09	78	14-3-3epsilon, 14-3-3zeta, Ac78C, Adgf-A, Akap200, alpha-Spec, beta-Spec, BI-1, bib, BM-40-SPARC, cbt, CG12290, CG12517, CG13516, CG5059, CG7497, CG8965, chrb, ckn, cno, cry, Csk, cv-c, Diedel, dm, dome, drl, Ect4, edl, Egfr, elB, Fas2, fng, Fs, fz2, GABA-B-R2, Galpha73B, Gli, Hmgs, Hr96, Hrb27C, Ilp6, ImpL2, kek1, laza, Lrch, MadM, MESR3, Mmp2, modSP, mp, msn, mthl3, mthl4, mthl8, Nf-YA, ogre, P…
GO:0016477	cell migration	5.13557e-06	3.5103e-09	27	14-3-3epsilon, CG13636, CG14869, Csk, CSN5, cv-c, dome, Egfr, ena, fz2, Gli, Hrb27C, l(1)G0232, LanB1, Mdr49, Mmp2, Msp-300, phm, pnt, Pvr, Rho1, scb, Socs36E, Src64B, Strn-Mlck, upd1, zip
GO:0007391	dorsal closure	8.08475e-06	5.52614e-09	15	cbt, Cg25C, cno, cora, cv-c, Egfr, ena, Inx3, Mbs, msn, Rho1, scb, Src64B, ush, zip
GO:0009790	embryo development	1.04754e-05	7.16021e-09	38	14-3-3zeta, BM-40-SPARC, cbt, Cg25C, chrb, cno, cora, CSN5, cv-c, dm, dome, edl, Egfr, ena, h, Hmgs, Hrb27C, Inx3, LanB1, Lasp, m, Mbs, mid, Mmp2, msn, phm, pnt, Pvr, Rho1, scb, Sema-1b, spn-F, Src64B, sty, tsl, upd1, ush, zip
GO:0048812	neuron projection morphogenesis	1.13248e-05	7.74078e-09	36	14-3-3epsilon, Aats-gln, alpha-Spec, beta-Spec, betaTub60D, CG10249, CG9372, ckn, CSN5, cv-c, cwo, drl, Dscam, ena, Fas1, Fas2, Fas3, fax, Frl, fz2, Hrb27C, jim, LpR2, Mbs, metro, mid, Mmp2, mp, msn, Pka-R2, Rho1, scb, Smox, Src64B, Sulf1, trol
GO:0120039	plasma membrane bounded cell projection morphogenesis	1.18085e-05	8.07145e-09	36	14-3-3epsilon, Aats-gln, alpha-Spec, beta-Spec, betaTub60D, CG10249, CG9372, ckn, CSN5, cv-c, cwo, drl, Dscam, ena, Fas1, Fas2, Fas3, fax, Frl, fz2, Hrb27C, jim, LpR2, Mbs, metro, mid, Mmp2, mp, msn, Pka-R2, Rho1, scb, Smox, Src64B, Sulf1, trol
GO:0048858	cell projection morphogenesis	1.18085e-05	8.07145e-09	36	14-3-3epsilon, Aats-gln, alpha-Spec, beta-Spec, betaTub60D, CG10249, CG9372, ckn, CSN5, cv-c, cwo, drl, Dscam, ena, Fas1, Fas2, Fas3, fax, Frl, fz2, Hrb27C, jim, LpR2, Mbs, metro, mid, Mmp2, mp, msn, Pka-R2, Rho1, scb, Smox, Src64B, Sulf1, trol
GO:0007166	cell surface receptor signaling pathway	1.21068e-05	8.27535e-09	40	bib, cbt, CG8965, ckn, cno, Csk, cv-c, dm, dome, drl, edl, Egfr, elB, Fas2, fng, Fs, fz2, Ilp6, ImpL2, kek1, Mmp2, modSP, mp, mthl3, mthl4, PGRP-LC, pnt, Prosap, Pvr, Rho1, Smox, Socs36E, Src64B, sty, Sulf1, trol, tsl, Tsp42Ed, Tsp42Ee, ush
GO:2000026	regulation of multicellular organismal development	1.22816e-05	8.39482e-09	33	Akap200, alpha-Spec, beta-Spec, CG6490, cno, CSN5, cv-c, desat1, dm, Dscam, E(spl)m3-HLH, E(spl)mbeta-HLH, Egfr, ena, Fas2, Imp, Lasp, m, Mbs, metro, mid, msn, pnt, Rho1, scb, Smox, Socs36E, spn-F, Src64B, sty, Syp, Syx4, upd1
GO:0048513	animal organ development	1.27917e-05	8.74346e-09	64	14-3-3epsilon, Adgf-A, Akap200, AnnIX, betaTub60D, BI-1, bib, BM-40-SPARC, bwa, cbt, CG13377, CG14869, Cg25C, CG30069, CG8369, CG8965, cno, cora, CSN5, cv-c, desat1, dm, dome, drl, Dscam, E(spl)m3-HLH, E(spl)mbeta-HLH, edl, Egfr, elB, ena, f, Fas2, fng, Frl, fz2, Gli, h, Idgf3, LamC, LanB1, LanB2, m, Mbs, mid, Mmp2, msn, Msp-300, Nf-YA, noc, pico, pnt, Pvr, Rho1, scb, Smox, Sobp, Socs36E, spn-F, …
GO:0007169	transmembrane receptor protein tyrosine kinase signaling pathway	1.67213e-05	1.14295e-08	19	CG8965, Csk, cv-c, edl, Egfr, Fas2, Ilp6, ImpL2, kek1, Mmp2, pnt, Pvr, Rho1, Socs36E, Src64B, sty, Sulf1, tsl, ush
GO:0032990	cell part morphogenesis	1.71309e-05	1.17094e-08	36	14-3-3epsilon, Aats-gln, alpha-Spec, beta-Spec, betaTub60D, CG10249, CG9372, ckn, CSN5, cv-c, cwo, drl, Dscam, ena, Fas1, Fas2, Fas3, fax, Frl, fz2, Hrb27C, jim, LpR2, Mbs, metro, mid, Mmp2, mp, msn, Pka-R2, Rho1, scb, Smox, Src64B, Sulf1, trol
GO:0007167	enzyme linked receptor protein signaling pathway	1.78698e-05	1.22145e-08	23	cbt, CG8965, ckn, Csk, cv-c, edl, Egfr, Fas2, Fs, Ilp6, ImpL2, kek1, Mmp2, pnt, Pvr, Rho1, Smox, Socs36E, Src64B, sty, Sulf1, tsl, ush
GO:0051716	cellular response to stimulus	2.42564e-05	1.65799e-08	78	14-3-3epsilon, 14-3-3zeta, Ac78C, Adgf-A, Akap200, bark, BI-1, bib, BM-40-SPARC, cbt, CG12290, CG12517, CG13516, CG1600, CG33298, CG5059, CG7497, CG8965, chrb, ckn, cno, cry, Csk, CSN5, cv-c, Diedel, dm, dome, drl, Ect4, edl, Egfr, elB, Fas2, fng, Fs, fz2, GABA-B-R2, Galpha73B, Hr96, Ilp6, Imp, ImpL2, Irc, kek1, laza, Lrch, MadM, MESR3, Mmp2, modSP, mp, msn, mthl3, mthl4, mthl8, ogre, PGRP-LC, pi…
GO:0032501	multicellular organismal process	2.53799e-05	1.73478e-08	144	14-3-3epsilon, 14-3-3zeta, Aats-gln, Ac78C, AcCoAS, Adgf-A, Akap200, alpha-Spec, AnnIX, aru, Atf3, Baldspot, bark, beta-Spec, betaTub60D, BI-1, bib, BM-40-SPARC, bwa, cbt, CG10249, CG10433, CG12517, CG13377, CG13636, CG13868, CG14869, CG1572, CG1600, CG18067, Cg25C, CG30069, CG46339, CG6426, CG6490, CG8369, CG8965, CG9372, CG9894, chrb, ckn, cno, cora, cry, Csk, CSN5, cv-c, cwo, desat1, dm, dome,…
GO:0016331	morphogenesis of embryonic epithelium	2.55893e-05	1.7491e-08	16	cbt, Cg25C, cno, cora, cv-c, Egfr, ena, Inx3, Mbs, Mmp2, msn, Rho1, scb, Src64B, ush, zip
GO:0035295	tube development	3.16569e-05	2.16383e-08	42	14-3-3epsilon, AnnIX, bib, BM-40-SPARC, cbt, Cg25C, CG30069, CG8369, cora, cv-c, desat1, dm, dome, drl, Egfr, elB, f, Fas2, fng, fz2, Gli, h, Idgf3, LanB1, LanB2, m, Mbs, mid, Mmp2, msn, noc, pico, pnt, Pvr, Rho1, scb, Smox, Socs36E, Ssk, sty, upd1, zip
GO:0048667	cell morphogenesis involved in neuron differentiation	3.32966e-05	2.27591e-08	32	14-3-3epsilon, Aats-gln, alpha-Spec, beta-Spec, betaTub60D, ckn, CSN5, cv-c, cwo, drl, Dscam, ena, Fas1, Fas2, Fas3, fax, Frl, fz2, Hrb27C, jim, Mbs, mid, Mmp2, mp, msn, Pka-R2, Rho1, scb, Smox, Src64B, Sulf1, trol
GO:0009792	embryo development ending in birth or egg hatching	3.65071e-05	2.49536e-08	21	cbt, Cg25C, chrb, cno, cora, cv-c, dm, Egfr, ena, Hmgs, Inx3, Mbs, msn, phm, Rho1, scb, Sema-1b, Src64B, upd1, ush, zip
GO:0030855	epithelial cell differentiation	3.72922e-05	2.54903e-08	29	alpha-Spec, bark, bib, CG12517, CG13636, cora, dome, Egfr, ena, f, Fas3, Gli, Hrb27C, l(1)G0232, m, Mbs, mid, phm, pnt, Pvr, Rho1, Socs36E, Src64B, Ssk, sty, Syp, upd1, ush, zip
GO:0048598	embryonic morphogenesis	4.38047e-05	2.99417e-08	22	BM-40-SPARC, cbt, Cg25C, chrb, cno, cora, cv-c, Egfr, ena, Inx3, LanB1, Mbs, Mmp2, msn, pnt, Pvr, Rho1, scb, Src64B, upd1, ush, zip
GO:0048870	cell motility	6.09465e-05	4.16586e-08	27	14-3-3epsilon, CG13636, CG14869, Csk, CSN5, cv-c, dome, Egfr, ena, fz2, Gli, Hrb27C, l(1)G0232, LanB1, Mdr49, Mmp2, Msp-300, phm, pnt, Pvr, Rho1, scb, Socs36E, Src64B, Strn-Mlck, upd1, zip
GO:0010646	regulation of cell communication	6.83034e-05	4.66872e-08	42	14-3-3epsilon, 14-3-3zeta, Akap200, alpha-Spec, beta-Spec, BI-1, cbt, CG8965, chrb, cno, Csk, cv-c, Diedel, dm, drl, edl, Egfr, Fas2, fng, Fs, GABA-B-R2, Gli, ImpL2, kek1, MESR3, Mmp2, modSP, mp, msn, PGRP-LC, pnt, Prosap, Pvr, Rho1, SH3PX1, Socs36E, Src64B, sty, Sulf1, Syp, trol, upd1
GO:0023051	regulation of signaling	7.05731e-05	4.82386e-08	42	14-3-3epsilon, 14-3-3zeta, Akap200, alpha-Spec, beta-Spec, BI-1, cbt, CG8965, chrb, cno, Csk, cv-c, Diedel, dm, drl, edl, Egfr, Fas2, fng, Fs, GABA-B-R2, Gli, ImpL2, kek1, MESR3, Mmp2, modSP, mp, msn, PGRP-LC, pnt, Prosap, Pvr, Rho1, SH3PX1, Socs36E, Src64B, sty, Sulf1, Syp, trol, upd1
GO:0050794	regulation of cellular process	7.93446e-05	5.42342e-08	112	14-3-3epsilon, 14-3-3zeta, Ac78C, Adgf-A, Akap200, alpha-Spec, Arpc3B, Atf3, beta-Spec, BI-1, bib, BM-40-SPARC, cbt, CG12290, CG12517, CG13516, CG14701, CG1572, CG18316, CG5059, CG6340, CG6490, CG7059, CG7497, CG8965, chrb, ckn, cno, cry, Csk, CSN5, cv-c, cwo, desat1, Diedel, dm, dome, drl, Dscam, E(spl)m3-HLH, E(spl)mbeta-HLH, Ect4, edl, Egfr, elB, ena, Fas2, fng, Fs, fz2, GABA-B-R2, Galpha73B, …
GO:0051674	localization of cell	9.0944e-05	6.21627e-08	27	14-3-3epsilon, CG13636, CG14869, Csk, CSN5, cv-c, dome, Egfr, ena, fz2, Gli, Hrb27C, l(1)G0232, LanB1, Mdr49, Mmp2, Msp-300, phm, pnt, Pvr, Rho1, scb, Socs36E, Src64B, Strn-Mlck, upd1, zip
GO:0050789	regulation of biological process	9.3932e-05	6.4205e-08	119	14-3-3epsilon, 14-3-3zeta, Ac78C, Adgf-A, Akap200, alpha-Spec, Arpc3B, Atf3, beta-Spec, BI-1, bib, BM-40-SPARC, bwa, cbt, CG11275, CG12290, CG12517, CG13516, CG14701, CG1572, CG18316, CG5059, CG6340, CG6490, CG7059, CG7497, CG8965, chrb, ckn, cno, cry, Csk, CSN5, cv-c, cwo, desat1, Diedel, dm, dome, drl, Dscam, E(spl)m3-HLH, E(spl)mbeta-HLH, Ect4, edl, Egfr, elB, ena, Fas2, fng, Fs, fz2, GABA-B-R…
GO:0001700	embryonic development via the syncytial blastoderm	9.65354e-05	6.59845e-08	20	cbt, Cg25C, chrb, cno, cora, cv-c, Egfr, ena, Hmgs, Inx3, Mbs, msn, phm, Rho1, scb, Sema-1b, Src64B, upd1, ush, zip
GO:0048729	tissue morphogenesis	0.000180641	1.23473e-07	37	Akap200, bib, BM-40-SPARC, cbt, Cg25C, cno, cora, CSN5, cv-c, dm, Egfr, ena, f, Fas2, fng, Frl, fz2, Gli, Inx3, LamC, LanB1, m, Mbs, Mmp2, msn, noc, pnt, Pvr, Rho1, scb, Smox, Socs36E, Src64B, sty, upd1, ush, zip
GO:0040007	growth	0.000203828	1.39322e-07	29	14-3-3epsilon, alpha-Spec, beta-Spec, CG6490, chrb, cno, Csk, desat1, dm, Dscam, ena, Fas2, Frl, fz2, Ilp6, Imp, Mbs, metro, pico, Prosap, rgn, Rho1, RpL30, scb, Src64B, Syp, Syx4, Thor, tsl
GO:0090066	regulation of anatomical structure size	0.000221773	1.51588e-07	19	AnnIX, Arpc3B, bark, bib, cora, desat1, dm, ena, Fas2, Gli, LamC, Lasp, MadM, pico, Rho1, Src64B, Thor, upd1, zip
GO:0048546	digestive tract morphogenesis	0.000229248	1.56697e-07	11	BM-40-SPARC, Cg25C, cv-c, dome, Egfr, LanB2, pnt, Pvr, Rho1, upd1, zip
GO:0051960	regulation of nervous system development	0.000250672	1.71341e-07	23	alpha-Spec, beta-Spec, CG6490, cv-c, dm, Dscam, E(spl)m3-HLH, E(spl)mbeta-HLH, ena, Fas2, Imp, Mbs, metro, mid, pnt, Rho1, scb, Socs36E, spn-F, Src64B, sty, Syp, Syx4
GO:0002009	morphogenesis of an epithelium	0.00029678	2.02857e-07	36	Akap200, bib, BM-40-SPARC, cbt, Cg25C, cno, cora, CSN5, cv-c, dm, Egfr, ena, f, Fas2, fng, Frl, fz2, Gli, Inx3, LanB1, m, Mbs, Mmp2, msn, noc, pnt, Pvr, Rho1, scb, Smox, Socs36E, Src64B, sty, upd1, ush, zip
GO:0009968	negative regulation of signal transduction	0.000325332	2.22373e-07	21	Akap200, BI-1, chrb, cv-c, Diedel, dm, drl, Egfr, Fas2, fng, Fs, ImpL2, kek1, MESR3, Mmp2, msn, pnt, Rho1, Socs36E, sty, Sulf1
GO:0048585	negative regulation of response to stimulus	0.000328255	2.24371e-07	23	Akap200, BI-1, chrb, cv-c, Diedel, dm, dome, drl, Egfr, Fas2, fng, Fs, ImpL2, kek1, MESR3, Mmp2, msn, pnt, Rho1, Socs36E, sty, Sulf1, upd1
GO:0038127	ERBB signaling pathway	0.000352459	2.40915e-07	11	CG8965, cv-c, edl, Egfr, Fas2, kek1, pnt, Rho1, Socs36E, sty, Sulf1
GO:0007173	epidermal growth factor receptor signaling pathway	0.000352459	2.40915e-07	11	CG8965, cv-c, edl, Egfr, Fas2, kek1, pnt, Rho1, Socs36E, sty, Sulf1
GO:0023057	negative regulation of signaling	0.000361349	2.46992e-07	22	Akap200, BI-1, chrb, cv-c, Diedel, dm, drl, Egfr, Fas2, fng, Fs, GABA-B-R2, ImpL2, kek1, MESR3, Mmp2, msn, pnt, Rho1, Socs36E, sty, Sulf1
GO:0010648	negative regulation of cell communication	0.000361349	2.46992e-07	22	Akap200, BI-1, chrb, cv-c, Diedel, dm, drl, Egfr, Fas2, fng, Fs, GABA-B-R2, ImpL2, kek1, MESR3, Mmp2, msn, pnt, Rho1, Socs36E, sty, Sulf1
GO:0048565	digestive tract development	0.000426507	2.91529e-07	13	BM-40-SPARC, Cg25C, cv-c, dome, Egfr, LanB2, pnt, Pvr, Rho1, scb, Ssk, upd1, zip
GO:0055123	digestive system development	0.000426507	2.91529e-07	13	BM-40-SPARC, Cg25C, cv-c, dome, Egfr, LanB2, pnt, Pvr, Rho1, scb, Ssk, upd1, zip
GO:0002064	epithelial cell development	0.000636386	4.34987e-07	25	alpha-Spec, bark, bib, CG12517, CG13636, dome, Egfr, ena, Fas3, Gli, Hrb27C, l(1)G0232, m, mid, phm, pnt, Pvr, Rho1, Socs36E, Src64B, Ssk, sty, Syp, upd1, zip
GO:0007444	imaginal disc development	0.000700638	4.78905e-07	33	14-3-3epsilon, AnnIX, bib, cbt, CG30069, CG8369, cora, cv-c, desat1, dm, drl, Egfr, elB, f, Fas2, fng, fz2, Gli, Idgf3, m, Mbs, mid, Mmp2, msn, noc, pico, pnt, Pvr, Rho1, Smox, Socs36E, upd1, zip
GO:0009887	animal organ morphogenesis	0.000894744	6.11582e-07	43	Akap200, BI-1, bib, cbt, CG14869, Cg25C, CG8965, cno, cora, CSN5, cv-c, dm, dome, drl, Egfr, elB, ena, f, Fas2, fng, Frl, fz2, Gli, h, LamC, LanB1, LanB2, m, Mbs, Mmp2, msn, Nf-YA, noc, pnt, Pvr, Rho1, Smox, Socs36E, spn-F, Src64B, sty, upd1, zip
GO:0043062	extracellular structure organization	0.00105952	7.24208e-07	10	BM-40-SPARC, CG14869, Fas1, LanB1, LanB2, Mbs, Mmp2, mp, Ppn, Src64B
GO:0007389	pattern specification process	0.00110393	7.54569e-07	31	14-3-3epsilon, 14-3-3zeta, AnnIX, cbt, CG8369, cno, cora, CSN5, dm, dome, edl, Egfr, ena, f, fng, Frl, Gli, h, Hrb27C, Lasp, m, mid, pnt, Rho1, spn-F, sty, Syp, tsl, upd1, ush, zip
GO:0051704	multi-organism process	0.00111691	7.63437e-07	69	14-3-3epsilon, 14-3-3zeta, alpha-Spec, Baldspot, bib, CG10433, CG12517, CG12744, CG13377, CG13636, CG14869, CG17323, CG6426, CG9372, CG9894, Csk, CSN5, Cyp6a13, desat1, Diedel, dm, dome, Dscam, Egfr, ena, Fas3, fng, Gli, Hrb27C, Imp, kek1, l(1)G0232, LamC, LanB1, Lasp, Mbs, Mdr49, mid, Mmp2, modSP, msn, Msp-300, noc, pain, PebIII, PGRP-LA, PGRP-LC, Phk-3, phm, pnt, ppk29, Pvr, Rho1, scb, Socs36E,…
GO:0048569	post-embryonic animal organ development	0.00111949	7.65201e-07	28	Adgf-A, bib, BM-40-SPARC, cbt, cora, CSN5, cv-c, dm, Egfr, f, Fas2, fng, fz2, Gli, m, Mbs, Mmp2, msn, Msp-300, pnt, Pvr, Rho1, scb, Smox, Socs36E, upd1, ush, zip
GO:0048589	developmental growth	0.00150541	1.02899e-06	24	alpha-Spec, beta-Spec, CG6490, cno, desat1, dm, Dscam, ena, Fas2, Frl, fz2, Ilp6, Imp, Mbs, metro, pico, Prosap, rgn, Rho1, scb, Src64B, Syp, Syx4, tsl
GO:0002066	columnar/cuboidal epithelial cell development	0.0017068	1.16664e-06	23	alpha-Spec, bib, CG12517, CG13636, dome, Egfr, ena, Fas3, Gli, Hrb27C, l(1)G0232, mid, phm, pnt, Pvr, Rho1, Socs36E, Src64B, Ssk, sty, Syp, upd1, zip
GO:0009791	post-embryonic development	0.00175751	1.20131e-06	33	Adgf-A, BI-1, bib, BM-40-SPARC, cbt, CG14869, Cg25C, cora, CSN5, cv-c, dm, Egfr, f, Fas2, fng, fz2, Gli, m, Mbs, Mmp2, msn, Msp-300, Npc2b, phm, pnt, Pvr, Rho1, scb, Smox, Socs36E, upd1, ush, zip
GO:0048732	gland development	0.00217918	1.48953e-06	16	Adgf-A, BI-1, CG14869, cora, CSN5, drl, Egfr, fz2, h, LanB2, Pvr, Rho1, scb, Src64B, ush, zip
GO:0002065	columnar/cuboidal epithelial cell differentiation	0.00258108	1.76424e-06	23	alpha-Spec, bib, CG12517, CG13636, dome, Egfr, ena, Fas3, Gli, Hrb27C, l(1)G0232, mid, phm, pnt, Pvr, Rho1, Socs36E, Src64B, Ssk, sty, Syp, upd1, zip
GO:0035239	tube morphogenesis	0.00286132	1.95579e-06	30	bib, BM-40-SPARC, cbt, Cg25C, cora, cv-c, dm, dome, Egfr, f, Fas2, fng, fz2, Gli, h, LanB1, LanB2, m, Mbs, Mmp2, msn, noc, pnt, Pvr, Rho1, Smox, Socs36E, sty, upd1, zip
GO:0008283	cell proliferation	0.0036865	2.51982e-06	22	Adgf-A, alpha-Spec, CG1572, cno, Csk, CSN5, dm, dome, E(spl)m3-HLH, E(spl)mbeta-HLH, Egfr, elB, fz2, Galpha73B, MadM, noc, pnt, Pvr, Rho1, Smox, Src64B, zip
GO:0007155	cell adhesion	0.00371575	2.53982e-06	16	bib, BM-40-SPARC, cora, Egfr, Fas1, Fas2, Fas3, Gli, ImpL2, LanB1, LanB2, m, mp, p130CAS, scb, Src64B
GO:0035272	exocrine system development	0.0040644	2.77813e-06	13	BI-1, CG14869, cora, drl, Egfr, fz2, h, LanB2, Pvr, Rho1, scb, Src64B, zip
GO:0007431	salivary gland development	0.0040644	2.77813e-06	13	BI-1, CG14869, cora, drl, Egfr, fz2, h, LanB2, Pvr, Rho1, scb, Src64B, zip
GO:0061525	hindgut development	0.00423629	2.89562e-06	9	BM-40-SPARC, cv-c, dome, Egfr, pnt, Pvr, Rho1, upd1, zip
GO:0007442	hindgut morphogenesis	0.00423629	2.89562e-06	9	BM-40-SPARC, cv-c, dome, Egfr, pnt, Pvr, Rho1, upd1, zip
GO:0022610	biological adhesion	0.00450647	3.0803e-06	16	bib, BM-40-SPARC, cora, Egfr, Fas1, Fas2, Fas3, Gli, ImpL2, LanB1, LanB2, m, mp, p130CAS, scb, Src64B
GO:0030707	ovarian follicle cell development	0.00577715	3.94883e-06	22	alpha-Spec, bib, CG12517, CG13636, dome, Egfr, ena, Fas3, Gli, Hrb27C, l(1)G0232, mid, phm, pnt, Pvr, Rho1, Socs36E, Src64B, sty, Syp, upd1, zip
GO:0007163	establishment or maintenance of cell polarity	0.00835033	5.70768e-06	16	14-3-3epsilon, 14-3-3zeta, AnnIX, cno, cora, Csk, cv-c, Egfr, Frl, p130CAS, pnt, Rho1, spn-F, sty, trol, zip
GO:0009966	regulation of signal transduction	0.00849346	5.80551e-06	34	14-3-3epsilon, 14-3-3zeta, Akap200, BI-1, cbt, CG8965, chrb, cno, cv-c, Diedel, dm, drl, edl, Egfr, Fas2, fng, Fs, ImpL2, kek1, MESR3, Mmp2, modSP, mp, msn, PGRP-LC, pnt, Prosap, Pvr, Rho1, Socs36E, sty, Sulf1, trol, upd1
GO:0043207	response to external biotic stimulus	0.00852744	5.82874e-06	22	CG12744, CG6426, CG9372, Cyp6a13, Diedel, dome, Dscam, LanB1, modSP, PebIII, PGRP-LA, PGRP-LC, Phk-3, Pvr, Spn42Dd, Tep4, Thor, TotA, TotM, upd1, ush, vir-1
GO:0009607	response to biotic stimulus	0.00852744	5.82874e-06	22	CG12744, CG6426, CG9372, Cyp6a13, Diedel, dome, Dscam, LanB1, modSP, PebIII, PGRP-LA, PGRP-LC, Phk-3, Pvr, Spn42Dd, Tep4, Thor, TotA, TotM, upd1, ush, vir-1
GO:0051707	response to other organism	0.00852744	5.82874e-06	22	CG12744, CG6426, CG9372, Cyp6a13, Diedel, dome, Dscam, LanB1, modSP, PebIII, PGRP-LA, PGRP-LC, Phk-3, Pvr, Spn42Dd, Tep4, Thor, TotA, TotM, upd1, ush, vir-1
GO:0006950	response to stress	0.00874362	5.9765e-06	50	14-3-3epsilon, Adgf-A, bark, BI-1, CG10433, CG12744, CG13510, CG1600, CG33298, CG6426, chrb, cno, Csk, CSN5, Cyp6a13, desat1, Diedel, dm, dome, Ect4, Egfr, h, Hr96, Idgf3, Imp, Irc, LanB1, Mdr49, Mmp2, modSP, msn, mthl3, mthl4, mthl8, pain, PGRP-LA, PGRP-LC, Pvr, rgn, Rho1, scb, SH3PX1, Spn42Dd, Src64B, Thor, TotA, TotM, upd1, vir-1, zip
GO:0030198	extracellular matrix organization	0.00950172	6.49468e-06	8	BM-40-SPARC, CG14869, Fas1, LanB1, LanB2, Mmp2, mp, Ppn
GO:0022612	gland morphogenesis	0.00964772	6.59448e-06	11	BI-1, CG14869, cora, drl, fz2, h, LanB2, Pvr, Rho1, Src64B, zip
GO:0007435	salivary gland morphogenesis	0.00964772	6.59448e-06	11	BI-1, CG14869, cora, drl, fz2, h, LanB2, Pvr, Rho1, Src64B, zip
	P-value cutoff	0.01
	Regulation links followed	Yes
	Bonferroni correction	1463
	Annotated identifiers	266
	Unknown identifiers	37
	Unannotated identifiers	52
	Background size	16085
	Min p-value	5.90475e-14
	List size	318
